# Supplementary material for: Silver-catalyzed silicon–hydrogen bond functionalization by carbene insertion
Source: Royal Society of Chemistry journal article supplement (doi:10.1039/c2dt31460f), 2012-10-22

## Electronic Supplementary Information for

# Silver-Catalyzed Silicon-Hydrogen Bond Functionalization by Carbene Insertion

*M. José Iglesias,<sup>a</sup> M. Carmen Nicasio,<sup>b</sup> Ana Caballero,<sup>a,\*</sup> and Pedro J. Pérez<sup>a,\*</sup>*

Selected NMR data for compounds **3-13**, those of the competition experiments with different silanes and EDA, and those with other diazocompounds.

### **Ethyl 2-(triethylsilyl)acetate (**3**):**

O. Andrey, Y. Landais, D. Planchenault, D. Weber, *Tetrahedron*, 1995, **51**, 12083.

<sup>1</sup>H NMR (400 MHz, CDCl<sub>3</sub>): δ 0.55 (q, 2H, *J* = 7.9 Hz, SiCH<sub>2</sub>CH<sub>3</sub>), 0.89 (t, 3H, *J* = 7.9 Hz, SiCH<sub>2</sub>CH<sub>3</sub>), 1.17 (t, 3H, *J* = 7.1 Hz, CO<sub>2</sub>CH<sub>2</sub>CH<sub>3</sub>), 1.81 (s, 2H, SiCH<sub>2</sub>), 4.01 (q, 2H, *J* = 7.1 Hz, CO<sub>2</sub>CH<sub>2</sub>CH<sub>3</sub>).

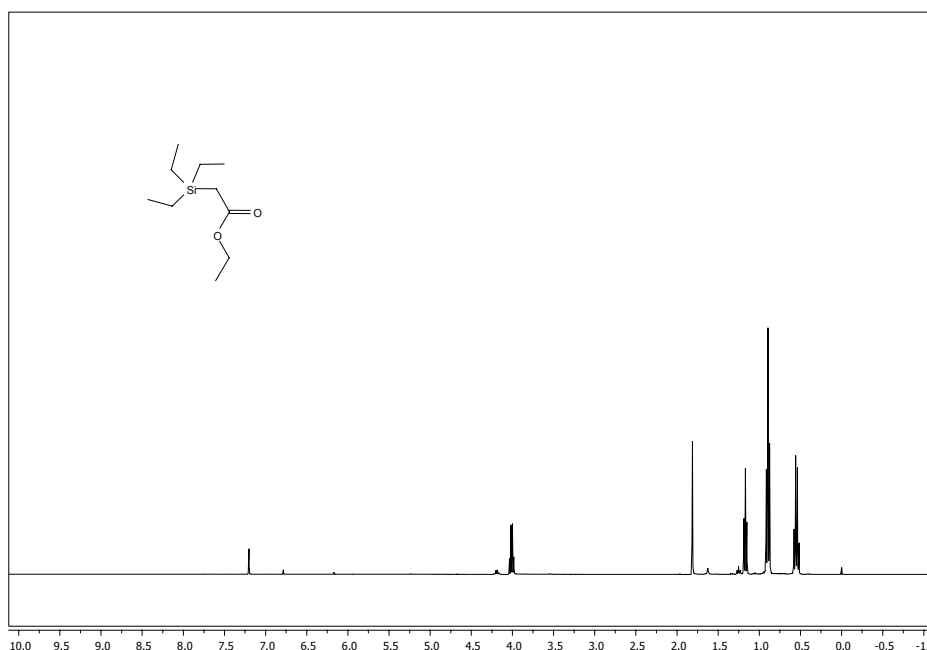

**Ethyl-2-(diethylsilyl)acetate (4):**

R. I. Pal'ChicK, L. L. Schchkovskaya, A. I. Kol'tsov. *Zhurnal Obschei Khimi*, 1969, **39**, 1792.

$^1\text{H NMR}$  (400 MHz,  $\text{CDCl}_3$ ):  $\delta$  0.62 (q, 2H,  $J = 7.9$  Hz,  $\text{SiCH}_2\text{CH}_3$ ), 0.93 (t, 3H,  $J = 7.9$  Hz,  $\text{SiCH}_2\text{CH}_3$ ), 1.16 (t, 3H,  $J = 7.1$  Hz,  $\text{CO}_2\text{CH}_2\text{CH}_3$ ) 1.89 (d, 2H,  $J = 3.1$  Hz,  $\text{SiCH}_2$ ), 3.78 (m, 1H,  $\text{SiH}$ ), 4.02 (q, 2H,  $J = 7.1$  Hz,  $\text{CO}_2\text{CH}_2\text{CH}_3$ ).

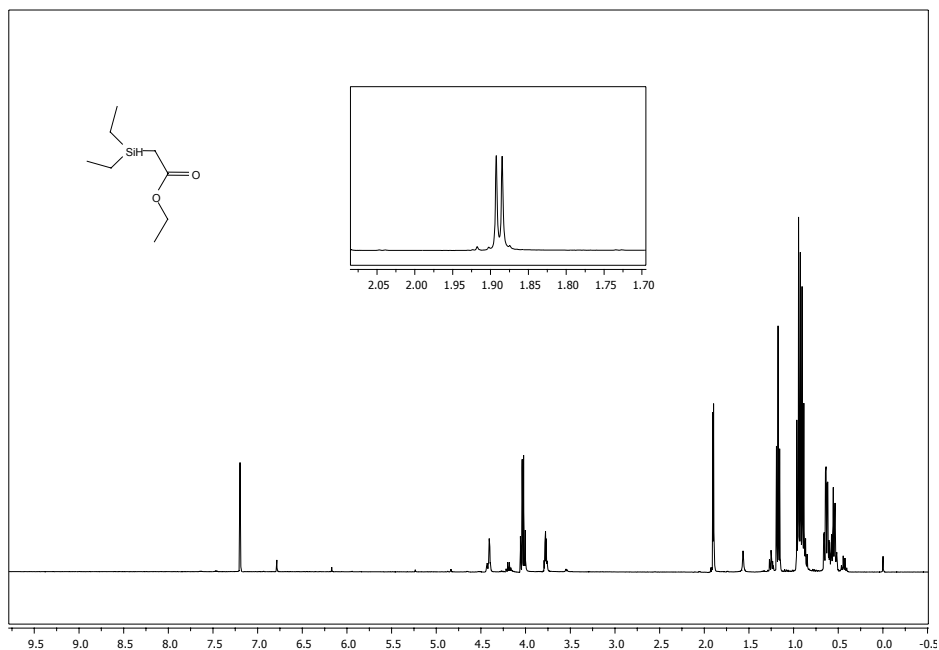

**Ethyl 2-(triphenylsilyl)acetate (5):**

O. Andrey, Y. Landais, D. Planchenault, D. Weber, *Tetrahedron*, 1995, **51**, 12083.

$^1\text{H}$  NMR (400 MHz,  $\text{CDCl}_3$ ):  $\delta$  1.12 (t, 3H,  $J = 7.1$  Hz,  $\text{CO}_2\text{CH}_2\text{CH}_3$ ), 2.96 (s, 2H,  $\text{SiCH}_2$ ), 4.06 (q, 2H,  $J = 7.1$  Hz,  $\text{CO}_2\text{CH}_2\text{CH}_3$ ), 7.52-7.60 (m, 9H,  $\text{CH}_{\text{Ar}}$ ), 7.39-7.81 (m, 6H,  $\text{CH}_{\text{Ar}}$ ).

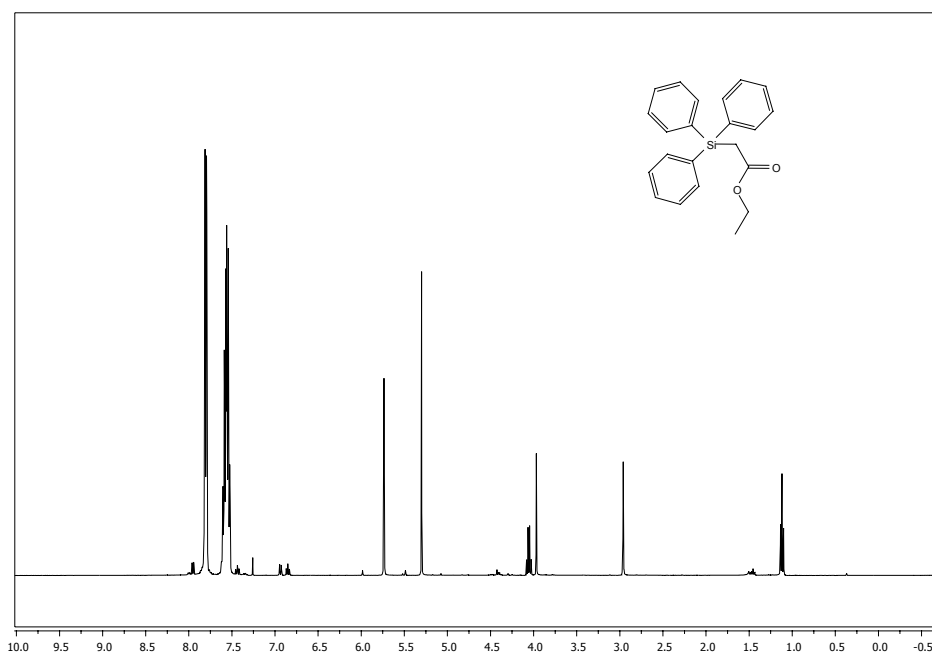

**Ethyl 2-(diphenylsilyl)acetate (6):**

K. A. W. Kramer, A. N. Wright, *J. Chem. Soc.*, 1963, 3604.

$^1\text{H}$  NMR (400 MHz,  $\text{CDCl}_3$ ):  $\delta$  1.13 (t, 3H,  $J = 7.1$  Hz,  $\text{CO}_2\text{CH}_2\text{CH}_3$ ), 2.58 (d, 2H,  $J = 3.6$  Hz,  $\text{SiCH}_2$ ), 4.06 (q, 2H,  $J = 7.1$  Hz,  $\text{CO}_2\text{CH}_2\text{CH}_3$ ), 5.20 (t, 1H,  $J = 3.6$  Hz,  $\text{SiH}$ ), 7.44-7.51 (m, 9H,  $\text{CH}_{\text{Ar}}$ ), 7.69-7.72 (m, 6H,  $\text{CH}_{\text{Ar}}$ ).

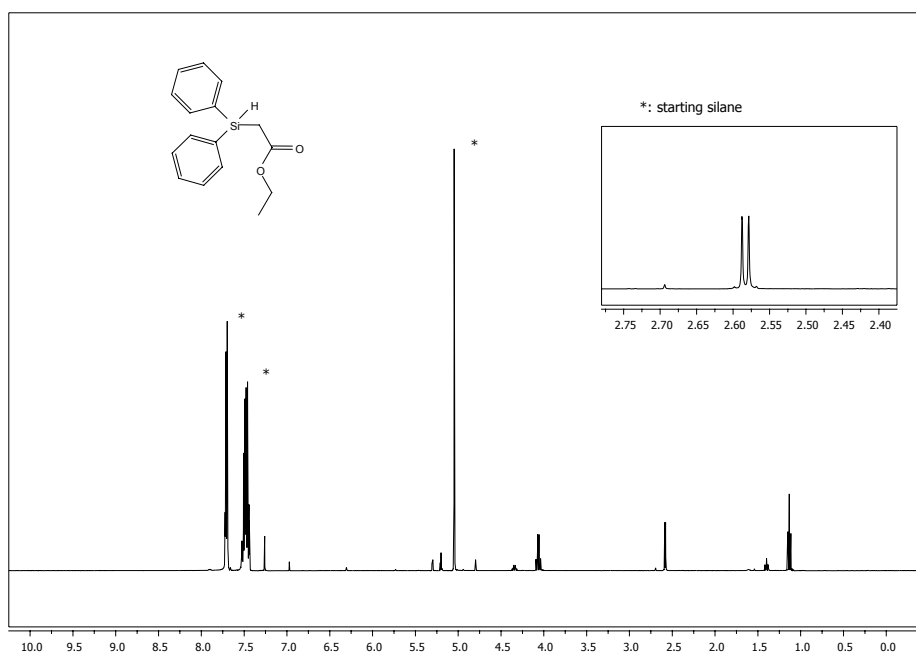

**Ethyl 2-(phenylsilyl)acetate (7):**

K. A. W. Kramer, A. N. Wright, *J. Chem. Soc.*, 1963, 3604.

$^1\text{H}$  NMR (400 MHz,  $\text{CDCl}_3$ ):  $\delta$  1.09 (t, 3H,  $J = 7.1$  Hz,  $\text{CO}_2\text{CH}_2\text{CH}_3$ ), 2.18 (t, 2H,  $J = 4.0$  Hz,  $\text{SiCH}_2$ ), 3.99 (q, 2H,  $J = 7.1$  Hz,  $\text{CO}_2\text{CH}_2\text{CH}_3$ ), 4.42 (t, 2H,  $J = 4.0$  Hz,  $\text{SiH}$ ), 7.25-7.40 (m, 9H,  $\text{CH}_{\text{Ar}}$ ), 7.50-7.55 (m, 6H,  $\text{CH}_{\text{Ar}}$ ).

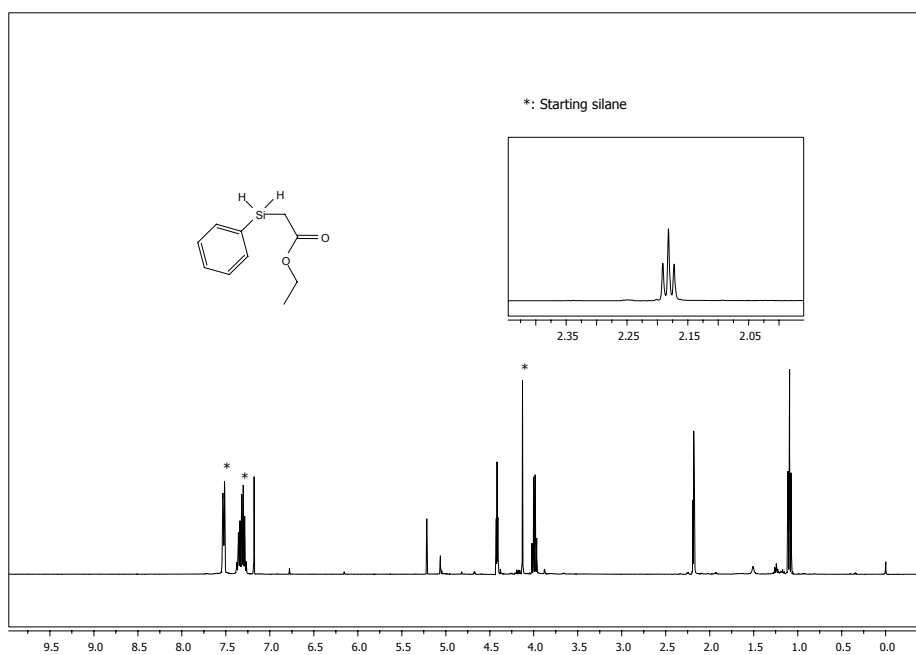

**Ethyl-2-(tripropylsilyl)acetate (8)**

$^1\text{H}$  NMR (400 MHz,  $\text{CDCl}_3$ ):  $\delta$  0.58 (m, 2H,  $\text{SiCH}_2\text{CH}_2\text{CH}_3$ ), 0.94 (t, 3H,  $J = 7.0$  Hz,  $\text{SiCH}_2\text{CH}_2\text{CH}_3$ ), 1.21 (t, 3H,  $J = 7.1$  Hz,  $\text{CO}_2\text{CH}_2\text{CH}_3$ ), 1.28-1.38 (m, 2H,  $\text{SiCH}_2\text{CH}_2\text{CH}_3$ ), 1.84 (s, 2H,  $\text{CH}_2\text{Si}$ ), 4.05 (q, 2H,  $J = 7.1$  Hz,  $\text{CO}_2\text{CH}_2\text{CH}_3$ ).

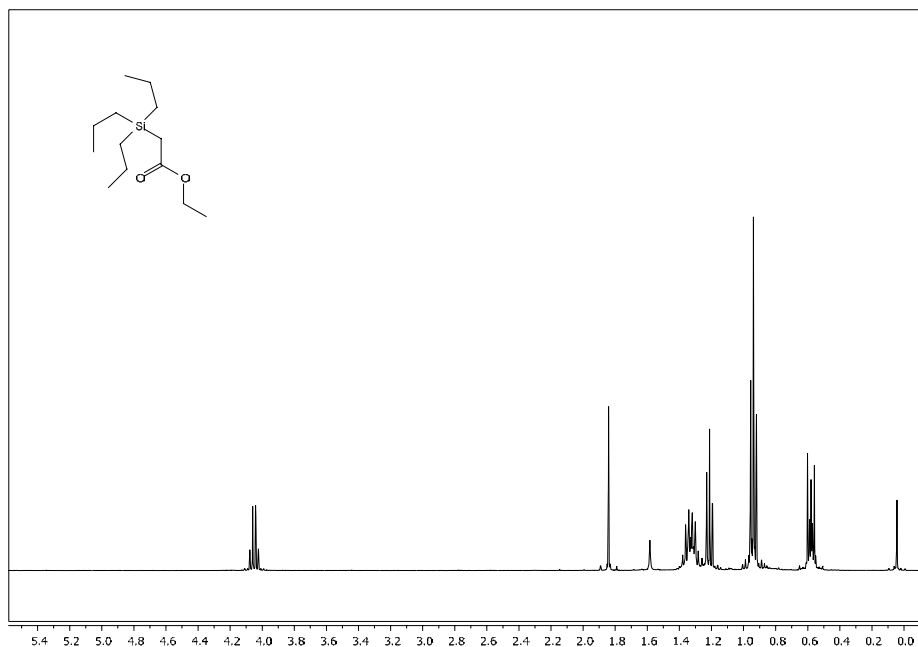

### Ethyl-2-(*tert*-butyldimethylsilyl)acetate (**9**)

R. Green James, *Science of Synthesis*, 2006, 8a, 427.

$^1\text{H}$  NMR (400 MHz,  $\text{CDCl}_3$ ):  $\delta$  0.05 (s, 6H,  $\text{SiCH}_3$ ), 0.89 (s, 9H,  $\text{SiC}(\text{CH}_3)_3$ ), 1.22 (t, 3H,  $J = 7.1$  Hz,  $\text{CO}_2\text{CH}_2\text{CH}_3$ ), 1.86 (s, 2H,  $\text{CH}_2\text{Si}$ ), 4.06 (q,  $J = 7.1$  Hz, 2H,  $\text{CO}_2\text{CH}_2\text{CH}_3$ )

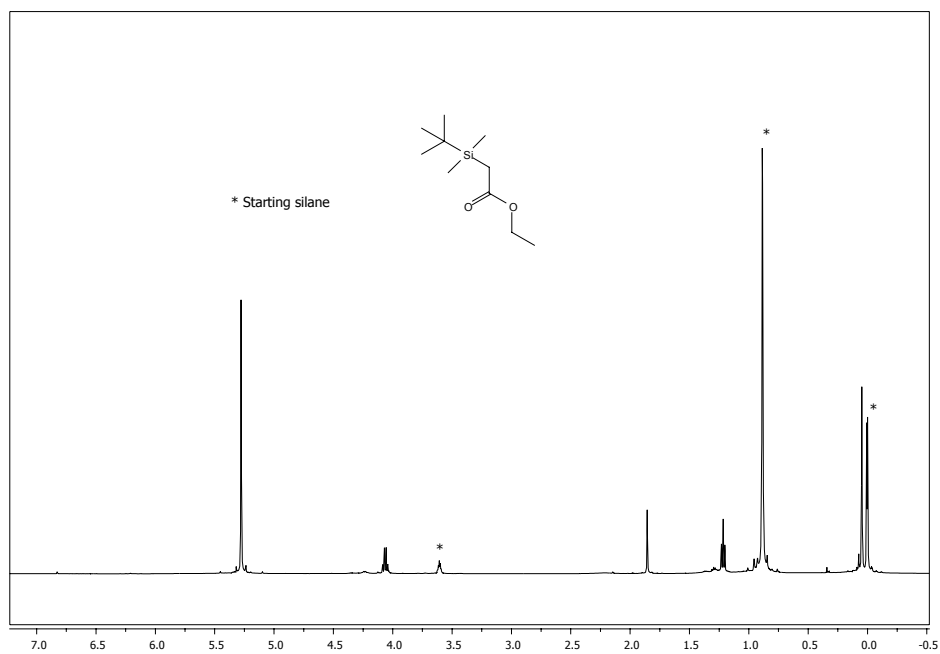

### Ethyl-2-(dimethyl(phenyl)silyl)acetate (10)

R. J. Fessenden, S. Fessenden, *J. Org. Chem.*, 1967, **32**, 3235.

$^1\text{H}$  NMR (400 MHz,  $\text{CDCl}_3$ ):  $\delta$  0.30 (s, 6H,  $\text{SiCH}_3$ ), 1.09 (t, 3H,  $J = 7.1$  Hz,  $\text{CO}_2\text{CH}_2\text{CH}_3$ ), 2.07 (s, 2H,  $\text{CH}_2\text{Si}$ ), 3.99 (q, 2H,  $J = 7.1$  Hz,  $\text{CO}_2\text{CH}_2\text{CH}_3$ ), 7.28-7.30 (m, 3H,  $\text{CH}_{\text{Ar}}$ ), 7.49-7.51 (m, 2H,  $\text{CH}_{\text{Ar}}$ ).

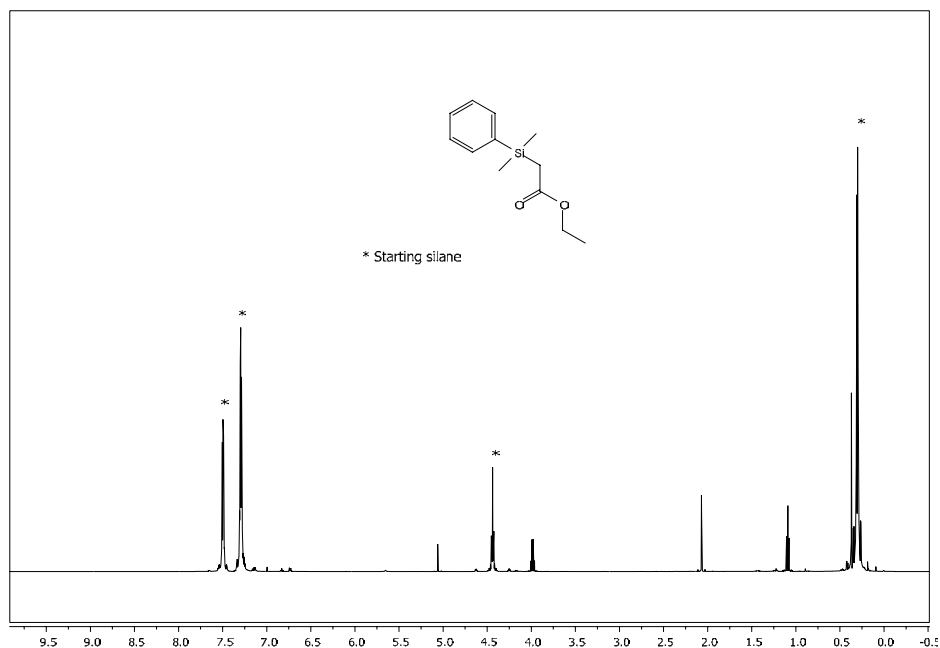



### Ethyl-2-(methyldiphenylsilyl)acetate (**11**)

R. J. Fessenden, S. Fessenden, *J. Org. Chem.*, 1967, **32**, 3235.

$^1\text{H}$  NMR (400 MHz,  $\text{CDCl}_3$ ):  $\delta$  0.56 (s, 3H,  $\text{SiCH}_3$ ), 0.96 (t, 3H,  $J = 7.1$  Hz,  $\text{CO}_2\text{CH}_2\text{CH}_3$ ), 2.36 (s, 2H,  $\text{CH}_2\text{Si}$ ), 3.88 (q, 2H,  $J = 7.1$  Hz,  $\text{CO}_2\text{CH}_2\text{CH}_3$ ), 7.23-7.34 (m, 6H,  $\text{CH}_{\text{Ar}}$ ), 7.59 (d, 4H,  $J = 9.6$  Hz,  $\text{CH}_{\text{Ar}}$ ).

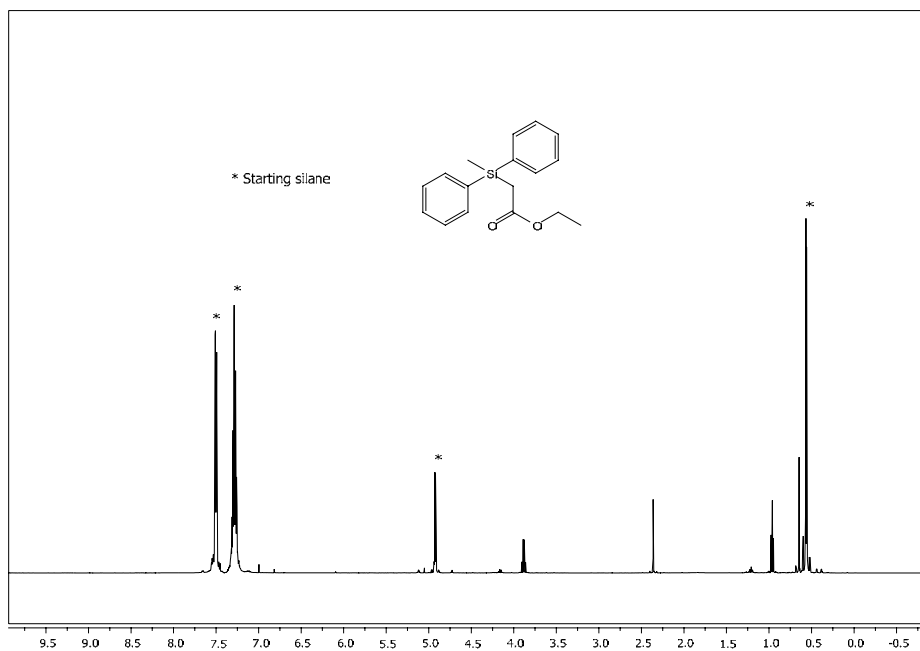

**Ethyl-2-phenyl(2-triethylsilyl)acetate (12)**

$^1\text{H}$  NMR (400 MHz,  $\text{CDCl}_3$ ):  $\delta$  0.52 (q, 6H,  $J = 7.9$  Hz,  $\text{CH}_2\text{CH}_3$ ), 0.83 (t, 9H,  $J = 7.9$  Hz,  $\text{CH}_2\text{CH}_3$ ), 1.20 (t, 3H,  $J = 7.9$  Hz,  $\text{CO}_2\text{CH}_2\text{CH}_3$ ), 3.42 (s, 1H, SiCH), 4.06 (q, 2H,  $J = 7.9$  Hz,  $\text{CO}_2\text{CH}_2\text{CH}_3$ ), 7.09 (t, 1H,  $J = 7.9$  Hz,  $\text{CH}_{\text{Ar}}$ ), 7.19 (t, 2H,  $J = 7.9$  Hz,  $\text{CH}_{\text{Ar}}$ ), 7.29 (d, 2H,  $J = 7.9$  Hz,  $\text{CH}_{\text{Ar}}$ ).

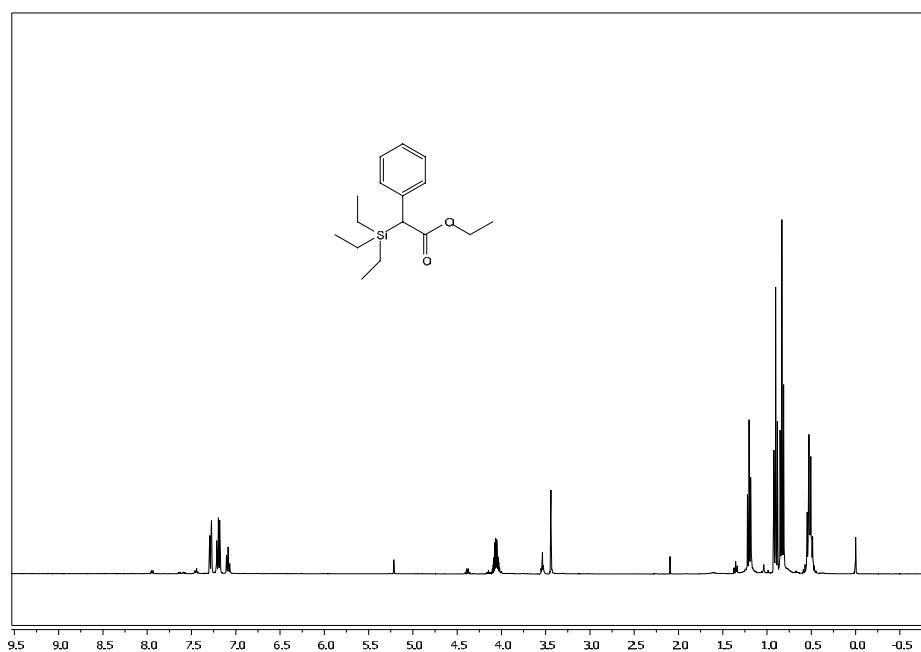

### Diethyl-2-(triethylsilyl)malonate (13)

$^1\text{H}$  NMR (400 MHz,  $\text{CDCl}_3$ ):  $\delta$  0.45 (q, 2H,  $J = 7.0$  Hz,  $\text{SiCH}_2\text{CH}_3$ ), 0.84 (t, 3H,  $J = 7.0$  Hz,  $\text{SiCH}_2\text{CH}_3$ ), 1.20 (t, 3H,  $J = 7.0$  Hz,  $\text{CO}_2\text{CH}_2\text{CH}_3$ ), 3.28 (s, 1H,  $\text{CHSi}$ ), 4.12 (q, 2H,  $J = 7.0$  Hz,  $\text{CO}_2\text{CH}_2\text{CH}_3$ ).

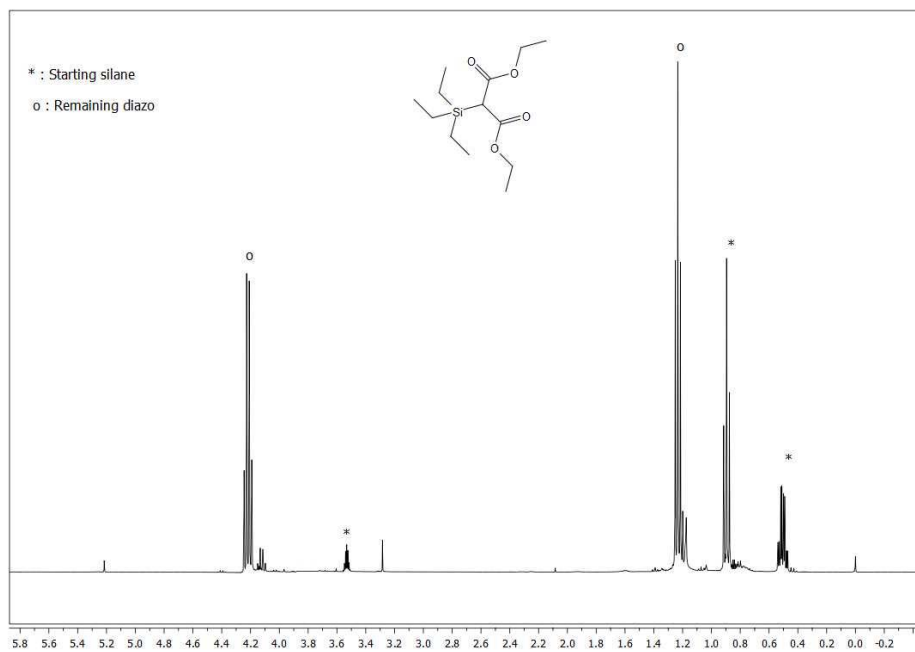

COMPETITION EXPERIMENTS WITH PHENYL (TOP) AND ETHYLSILANES  
(BOTTOM)

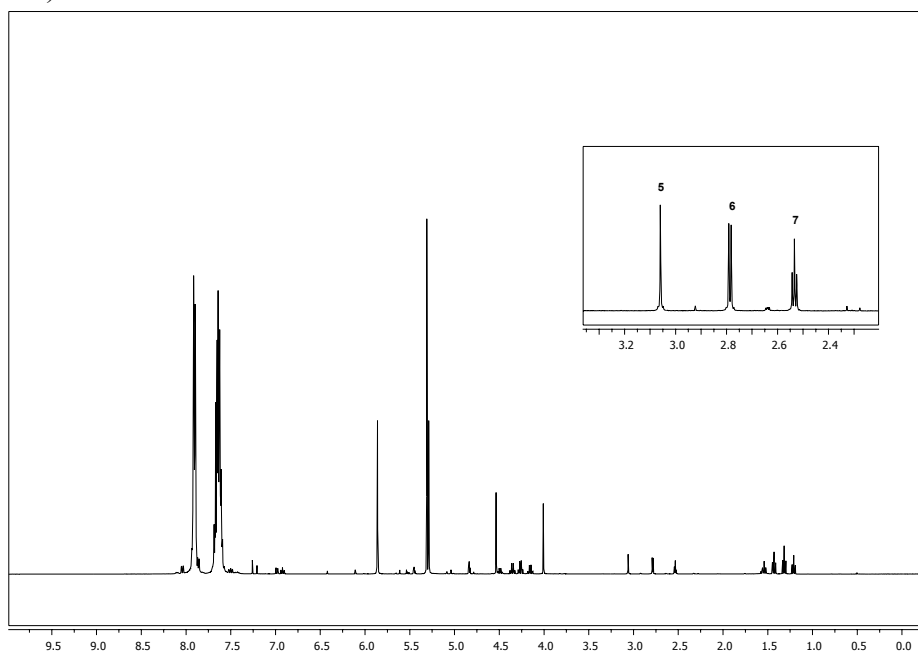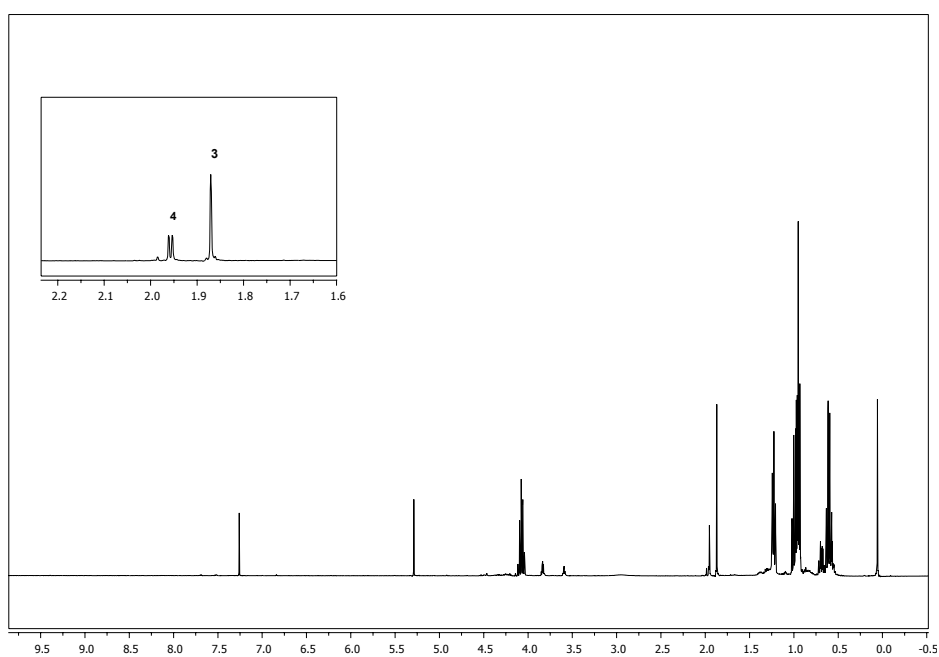

Supplement: c2dt31460f.pdf [file c2dt31460f.pdf]
